# Supplementary material for: Physiological, transcriptomic, and metabolomic analyses reveal the molecular regulatory mechanisms of walnut fruit in response to gibberellin and paclobutrazol
Source: Research Square preprint supplement (doi:10.21203/rs.3.rs-8172269/v1), 2026-01-12
Supplement: Supplementary file 1 [file 188894923a7758876500243f.xlsx]

## Sheet: Sheet1
Table S1 Q-primer sequence
Gene name	Forward primer sequence(5’-3’)	Reverse primer sequence(5’-3’)
GAPDH	ATGATGTCAAGGTTAAGGACTC	CACAATGATCTCAGCTCCG
GH3.6	ATGCCTGTGATTGCCTACGA	TATAGAACAGTGACCTCCTCTCCAT
SAUR72	TACGGCTACGAACAGAAGGGC	AGAGAAGGGGTAATCCTCAGAAGAA
AHK4	TTTTGAGGGCAAGGGCTACT	TTCCAGCAAGTTGACCAAGTAA
BOA	ACTCTTATCCCGCCGGAACTT	TCCGCTTCCTCAACGACCATA
PYL3	AGTTCACCTCGTTTGGTCTTTG	GGATGGAGGGAAATAATGGAC
THA1	AGGAGGCAGCCCTATTTGTT	CGTGTTTTCCAAGCAGATAAGC
APF1	TTTGGGTTCCCTGTGATTGC	GAATGTTCCAATGCATCGACTAC
VLN4	CGTCCATACAAGAGAGGGCTAAAG	GCAAAGCCACCAAAGAAAGC
PUX2	ACAAGACTTCGGAGGCAGCAA	CTGGCACAACCATTTCTTCG
TPR2	TCCTCCTCCTACAAACAGCCC	CCTGACATCCACCCAGCAAT
A36	AGTTGTAGCTCCTGCAATGGTT	AATGGGAGCCGAAGAGTTTG
MAKR1	TAACCGCCTTCATAATCCTACCC	TGGTCACGGTTCTTCGTTTCT
