# Supplementary material for: Physiological, transcriptomic, and metabolomic analyses reveal the molecular regulatory mechanisms of walnut fruit in response to gibberellin and paclobutrazol
Source: Research Square preprint supplement (doi:10.21203/rs.3.rs-8172269/v1), 2026-01-12
Supplement: Supplementary file 2 [file 71b1848bd548efac994073a7.xlsx]

## Sheet: Sheet1
	Table S3 statistical table of sequence alignment results between the sample sequencing data and the selected reference genome
	Sample	Total Reads	Mapped Reads	Uniq Mapped Reads	Multiple Map Reads	Reads Map to '+'	Reads Map to '-'
	CK1-1	46993340	44,937,145 (95.62%)	43,194,630 (91.92%)	1,742,515 (3.71%)	23,686,040 (50.40%)	23,675,113 (50.38%)
	CK1-2	54707054	52,351,979 (95.70%)	50,169,080 (91.70%)	2,182,899 (3.99%)	27,841,214 (50.89%)	27,799,568 (50.82%)
	CK1-3	45090462	42,955,106 (95.26%)	41,075,212 (91.10%)	1,879,894 (4.17%)	22,899,806 (50.79%)	22,880,902 (50.74%)
	GA1-1	38699916	36,580,358 (94.52%)	34,891,515 (90.16%)	1,688,843 (4.36%)	19,551,760 (50.52%)	19,540,896 (50.49%)
	GA1-2	45983008	44,004,986 (95.70%)	42,062,150 (91.47%)	1,942,836 (4.23%)	23,488,722 (51.08%)	23,468,018 (51.04%)
	GA1-3	50315678	47,628,661 (94.66%)	45,342,623 (90.12%)	2,286,038 (4.54%)	25,645,846 (50.97%)	25,635,652 (50.95%)
	P1-1	45862946	43,970,236 (95.87%)	42,039,034 (91.66%)	1,931,202 (4.21%)	23,499,412 (51.24%)	23,459,208 (51.15%)
	P1-2	44507312	39,307,728 (88.32%)	37,293,180 (83.79%)	2,014,548 (4.53%)	21,266,397 (47.78%)	21,242,985 (47.73%)
	P1-3	40643240	38,825,013 (95.53%)	37,087,121 (91.25%)	1,737,892 (4.28%)	20,756,685 (51.07%)	20,725,284 (50.99%)
