# Supplementary material for: Physiological, transcriptomic, and metabolomic analyses reveal the molecular regulatory mechanisms of walnut fruit in response to gibberellin and paclobutrazol
Source: Research Square preprint supplement (doi:10.21203/rs.3.rs-8172269/v1), 2026-01-12
Supplement: Supplementary file 3 [file 941e6394ff1544bafcd63b1f.xlsx]

## Sheet: Sheet1
Table S4 GFF files of new genes										Table S5 statistics of new gene function annotation results
#Seq_ID	Source	Type	Start	End	Score	Strand	Phase	Attributes		Annotated databases	New Gene Number
NC_049905.1	StringTie	gene	5363473	5379773	.	-	.	ID=NewGene_10		COG	210
NC_049905.1	StringTie	mRNA	5363473	5379773	.	-	.	ID=NewGene_10.1;Parent=NewGene_10		GO	1039
NC_049905.1	StringTie	exon	5363473	5363613	.	-	.	Parent=NewGene_10.1		KEGG	838
NC_049905.1	StringTie	exon	5364339	5364417	.	-	.	Parent=NewGene_10.1		KOG	618
NC_049905.1	StringTie	exon	5364508	5364862	.	-	.	Parent=NewGene_10.1		Pfam	790
NC_049905.1	StringTie	exon	5365308	5365544	.	-	.	Parent=NewGene_10.1		Swiss-Prot	727
NC_049905.1	StringTie	exon	5379615	5379773	.	-	.	Parent=NewGene_10.1		TrEMBL	1602
NC_049907.1	StringTie	gene	17395082	17395704	.	+	.	ID=NewGene_1000		eggNOG	1078
NC_049907.1	StringTie	mRNA	17395082	17395704	.	+	.	ID=NewGene_1000.1;Parent=NewGene_1000		nr	1587
										All	1648
