# Supplementary material for: Physiological, transcriptomic, and metabolomic analyses reveal the molecular regulatory mechanisms of walnut fruit in response to gibberellin and paclobutrazol
Source: Research Square preprint supplement (doi:10.21203/rs.3.rs-8172269/v1), 2026-01-12
Supplement: Supplementary file 4 [file 9676817212e284d92024be3a.xlsx]

## Sheet: Sheet1
	Table S2 sequencing data statistics
	Samples	Clean reads	Clean bases	GC Content	%≥Q30
	CK1-1	23496670	7035447490	0.4557	0.9451
	CK1-2	27353527	8188662998	0.4567	0.9444
	CK1-3	22545231	6749895126	0.4567	0.9484
	GA1-1	19349958	5793394396	0.4576	0.9426
	GA1-2	22991504	6884070616	0.457	0.9407
	GA1-3	25157839	7532258786	0.4598	0.9404
	P1-1	22931473	6865447844	0.4561	0.9463
	P1-2	22253656	6658179498	0.4656	0.9469
	P1-3	20321620	6085196260	0.4553	0.9449
